# Supplementary material for: Liquid dibromomethane under pressure: a computational study
Source: Royal Society of Chemistry journal article supplement (doi:10.1039/d0cp06458k), 2021-01-01
Supplement: d0cp06458k1.pdf [file d0cp06458k1.pdf]

## Supplementary Information

### Liquid dibromomethane under pressure: A computational study

Bernadeta Jasiok<sup>\*,a</sup>, Mirosław Chorażewski<sup>a</sup>, Eugene B. Postnikov<sup>b</sup>,  
and Claude Millot<sup>\*,c</sup>

<sup>a</sup> Institute of Chemistry, Department of Physical Chemistry, University of Silesia in Katowice, Szkolna 9, 40-006 Katowice, Poland. E-mail: [bjasiok@us.edu.pl](mailto:bjasiok@us.edu.pl)

<sup>b</sup> Department of Theoretical Physics, Kursk State University, Radishcheva St., 33, 305000 Kursk, Russia.

<sup>c</sup> Université de Lorraine, CNRS, LPCT, F-54000 Nancy, France, Boulevard des Aiguillettes, BP 70239, 54506 Vandoeuvre lès Nancy Cedex, France. Fax: +33 372745271; Tel: +33 372745281; E-mail: [claude.millot@univ-lorraine.fr](mailto:claude.millot@univ-lorraine.fr)

### Contents

|                                                |   |
|------------------------------------------------|---|
| 1. Force field parameters.                     | 2 |
| 2. Thermodynamic states studied by simulation. | 4 |
| 3. Isobaric thermal expansion coefficient.     | 5 |
| 4. Isothermal compressibility                  | 6 |
| 5. Constant volume heat capacity               | 6 |
| 6. Constant pressure heat capacity             | 7 |
| 7. Speed of sound                              | 8 |

## 1. Force field parameters

The atomic charges are ESP/6-31G\* charges, fitted to reproduce the electrostatic potential around the molecule as described in the article, are given in Table S1.a.

The Lennard-Jones parameters have been derived from the parameters of the GAFF2 force field<sup>1</sup> of atom types c3, br and hc. Here, the  $\sigma$  parameters are used rather than the  $R^*$  ones (for a pair of atoms of the same kind  $i$ ,  $\sigma_{ii} = 2R_i^*/(2^{1/6})$ ). For c3 atom, a value of 0.1079 kcal/mol for  $\epsilon_{ii}$  of c3 atom has been used by mistake instead of the exact value of 0.1078 kcal/mol. To try to improve the force field, scaling factors  $\lambda_\epsilon$  and  $\lambda_\sigma$  are introduced to globally scale all the  $\epsilon_{ii}$  and  $\sigma_{ii}$  parameters, respectively. This choice was made in order to limit the number of tuned parameters. For a given set of Lennard-Jones parameters ( $\lambda_\epsilon \epsilon_{ii}$ ,  $\lambda_\sigma \sigma_{ii}$ ), small MD simulations with experimental densities at 298 and 313 K (2.482 g/cm<sup>3</sup> and 2.444 g/cm<sup>3</sup>, respectively at 1 bar<sup>2</sup> have been performed to calculate the vaporization enthalpy and the set of two parameters ( $\lambda_\epsilon$ ,  $\lambda_\sigma$ ) is optimized by a trial-error procedure in order to reproduce as well as possible the experimental values (37.3 kJ/mol and 36.5 kJ/mol, respectively<sup>2</sup>). Eventually, the parameters of Table S1.a are obtained; they differ from the starting values by a factor 1.1025 for the  $\epsilon_{ii}$  and by a factor 0.9919012 for the  $\sigma_{ii}$ . This corresponds to a scaling of the attractive terms ( $4\epsilon\sigma^6$ ) by a factor 1.05, keeping the repulsive terms ( $4\epsilon\sigma^{12}$ ) unchanged. The parameters for pairs of dissimilar atoms ( $i, j$ ) are obtained from the Lorentz-Berthelot combination rules ( $\sigma_{ij} = (\sigma_{ii} + \sigma_{jj})/2$ ,  $\epsilon_{ij} = \sqrt{\epsilon_{ii} \cdot \epsilon_{jj}}$ ) which are used in the GAFF2 force field. Table S1.b compares the vaporization enthalpy obtained by MD simulations (original GAFF2 and tuned set of LJ parameters) with the experimental values.

| atom<br>type $i$ | $\epsilon_{ii}/\text{kcal.mol}^{-1}$ | $\sigma_{ii}/\text{\AA}$ | $q_i/e$<br>(e) |
|------------------|--------------------------------------|--------------------------|----------------|
| C                | 0.118960                             | 3.370192                 | -0.8730        |
| Br               | 0.433503                             | 3.583337                 | 0.0396         |
| H                | 0.022932                             | 2.579119                 | 0.3969         |

Table S1.a: Lennard-Jones parameters and atomic charges used in this study.  
 $e = 1.6 \cdot 10^{-19}$  C. 1 kcal = 4.184 kJ.

---

| T / K  | $\Delta H_{vap}$ / kJ/mol    |                        |                         |
|--------|------------------------------|------------------------|-------------------------|
|        | original GAFF2 LJ parameters | final set (Table S1.a) | experiment <sup>2</sup> |
| 298.15 | 34.7                         | 37.4                   | 37.3                    |
| 313.15 | 34.1                         | 36.7                   | 36.5                    |

---

Table S1.b: Vaporization enthalpy at experimental density from MD simulations compared to experimental results.

<sup>1</sup> : <https://github.com/choderalab/ambermini/blob/master/share/amber/dat/leap/parm/gaff2.dat>

<sup>2</sup> : Lide D.R. Handbook of Chemistry and Physics Web Edition, 92nd Ed. Publisher CRC. (2011-2012). Section 6: Fluid Properties. <http://www.hbcnetbase.com>.

## 2. Thermodynamic states studied by simulation

| $P_{target}/\text{bar}$      | $P_{MD}/\text{bar}$ | $T_{MD}/\text{K}$ | $E/\text{kJ.mol}^{-1}$ | $L/\text{\AA}$ |
|------------------------------|---------------------|-------------------|------------------------|----------------|
| $T_{target}=268.15\text{ K}$ |                     |                   |                        |                |
| 1                            | 0.1                 | 267.93            | -29.720                | 48.297901      |
| 250                          | 251.6               | 267.93            | -30.143                | 48.102987      |
| 500                          | 500.7               | 268.02            | -30.524                | 47.927721      |
| 750                          | 755.9               | 268.19            | -30.859                | 47.769139      |
| 1000                         | 1008.1              | 268.42            | -31.152                | 47.624351      |
| 1500                         | 1502.6              | 267.98            | -31.701                | 47.367942      |
| 2000                         | 2005.6              | 268.54            | -32.123                | 47.146391      |
| 2500                         | 2485.8              | 267.98            | -32.517                | 46.951328      |
| 3000                         | 2987.1              | 268.17            | -32.818                | 46.774033      |
| $T_{target}=283.15\text{ K}$ |                     |                   |                        |                |
| 1                            | -3.0                | 282.78            | -28.473                | 48.548252      |
| 250                          | 251.5               | 283.25            | -28.913                | 48.337721      |
| 500                          | 497.7               | 283.24            | -29.327                | 48.147490      |
| 750                          | 746.5               | 283.13            | -29.696                | 47.975408      |
| 1000                         | 998.5               | 283.08            | -30.026                | 47.818870      |
| 1500                         | 1501.7              | 283.39            | -30.583                | 47.543790      |
| 2000                         | 1996.4              | 283.01            | -31.056                | 47.307920      |
| 2500                         | 2495.1              | 283.24            | -31.446                | 47.100833      |
| 3000                         | 2982.0              | 283.23            | -31.789                | 46.915104      |
| $T_{target}=298.15\text{ K}$ |                     |                   |                        |                |
| 1                            | -3.4                | 298.28            | -27.201                | 48.814732      |
| 250                          | 249.3               | 298.08            | -27.729                | 48.572337      |
| 500                          | 495.8               | 298.04            | -28.168                | 48.365720      |
| 750                          | 746.9               | 298.18            | -28.557                | 48.179773      |
| 1000                         | 996.1               | 298.09            | -28.913                | 48.011405      |
| 1500                         | 1494.3              | 297.87            | -29.524                | 47.717273      |
| 2000                         | 1993.5              | 297.86            | -30.018                | 47.466674      |
| 2500                         | 2492.1              | 297.98            | -30.429                | 47.247699      |
| 3000                         | 2986.6              | 297.97            | -30.793                | 47.052040      |
| $T_{target}=313.15\text{ K}$ |                     |                   |                        |                |
| 1                            | -1.2                | 313.10            | -25.987                | 49.077783      |
| 250                          | 249.0               | 313.18            | -26.548                | 48.811442      |
| 500                          | 496.5               | 313.11            | -27.021                | 48.586366      |
| 750                          | 749.5               | 313.21            | -27.440                | 48.384844      |
| 1000                         | 1001.2              | 313.14            | -27.817                | 48.204522      |
| 1500                         | 1501.5              | 313.37            | -28.441                | 47.893498      |
| 2000                         | 1992.8              | 313.33            | -28.960                | 47.630948      |
| 2500                         | 2488.8              | 313.27            | -29.395                | 47.401779      |
| 3000                         | 3007.6              | 313.48            | -29.780                | 47.186333      |
| $T_{target}=328.15\text{ K}$ |                     |                   |                        |                |
| 1                            | -1.8                | 328.16            | -24.765                | 49.355108      |
| 250                          | 252.4               | 328.25            | -25.372                | 49.059708      |
| 500                          | 497.9               | 328.01            | -25.908                | 48.807445      |
| 750                          | 750.7               | 328.04            | -26.352                | 48.590963      |
| 1000                         | 998.5               | 328.12            | -26.741                | 48.399203      |
| 1500                         | 1493.0              | 327.93            | -27.415                | 48.070018      |
| 2000                         | 2006.1              | 328.09            | -27.968                | 47.782903      |
| 2500                         | 2496.0              | 328.11            | -28.428                | 47.542166      |
| 3000                         | 2998.2              | 328.15            | -28.818                | 47.326877      |

Table S2: Thermodynamic states studied by MD simulation.  $P_{target}$  and  $T_{target}$  are the desired pressure and temperature.  $P_{MD}$  and  $T_{MD}$  are the statistical average of the pressure and temperature obtained from the NVE simulations. E is the total energy of each simulation (including the long range correction due to the center of mass-based cutoff of Lennard-Jones interaction at 20 Å). L is the cubic box edge containing N=1000 molecules.

### 3. Isobaric thermal expansion coefficient

| P/bar | 268.15 K | 283.15 K | 298.15 K | 313.15 K | 328.15 K |
|-------|----------|----------|----------|----------|----------|
| 1     | 1.037    | 1.059    | 1.083    | 1.107    | 1.132    |
| 250   | 0.956    | 0.969    | 0.982    | 0.996    | 1.011    |
| 500   | 0.911    | 0.910    | 0.909    | 0.908    | 0.906    |
| 750   | 0.859    | 0.856    | 0.852    | 0.849    | 0.845    |
| 1000  | 0.811    | 0.809    | 0.806    | 0.803    | 0.800    |
| 1500  | 0.735    | 0.735    | 0.735    | 0.735    | 0.734    |
| 2000  | 0.693    | 0.683    | 0.673    | 0.662    | 0.651    |
| 2500  | 0.644    | 0.636    | 0.628    | 0.619    | 0.610    |
| 3000  | 0.593    | 0.589    | 0.585    | 0.581    | 0.577    |

Table S3:  $\alpha_P / 10^{-3} \text{ K}^{-1}$  from thermodynamic definition and raw MD simulation data.

| P/bar | 268.15 K | 283.15 K | 298.15 K | 313.15 K | 328.15 K |
|-------|----------|----------|----------|----------|----------|
| 1     | 1.049    | 1.063    | 1.078    | 1.094    | 1.110    |
| 250   | 0.970    | 0.978    | 0.986    | 0.994    | 1.002    |
| 500   | 0.906    | 0.910    | 0.914    | 0.917    | 0.920    |
| 750   | 0.853    | 0.854    | 0.855    | 0.855    | 0.855    |
| 1000  | 0.809    | 0.808    | 0.807    | 0.805    | 0.802    |
| 1500  | 0.738    | 0.734    | 0.730    | 0.725    | 0.721    |
| 2000  | 0.683    | 0.677    | 0.672    | 0.666    | 0.660    |
| 2500  | 0.638    | 0.632    | 0.626    | 0.619    | 0.612    |
| 3000  | 0.601    | 0.595    | 0.588    | 0.581    | 0.574    |

Table S4:  $\alpha_P / 10^{-3} \text{ K}^{-1}$  from thermodynamic definition and using a linear fit of  $\alpha_P^{-2}$  vs. pressure P.

#### 4. Isothermal compressibility

| P/bar | 268.15 K | 283.15 K | 298.15 K | 313.15 K | 328.15 K |
|-------|----------|----------|----------|----------|----------|
| 1     | 502.9    | 543.9    | 606.6    | 670.6    | 735.6    |
| 250   | 458.6    | 495.2    | 546.3    | 597.0    | 652.2    |
| 500   | 418.7    | 451.3    | 492.9    | 532.6    | 579.3    |
| 750   | 383.1    | 412.0    | 445.7    | 476.5    | 515.9    |
| 1000  | 351.5    | 377.1    | 404.3    | 428.1    | 461.2    |
| 1500  | 299.5    | 319.5    | 337.4    | 352.7    | 375.3    |
| 2000  | 261.4    | 276.9    | 290.3    | 303.5    | 317.9    |
| 2500  | 236.4    | 248.3    | 261.5    | 278.8    | 287.3    |
| 3000  | 223.7    | 232.8    | 250.0    | 277.0    | 281.8    |

Table S5:  $\kappa_T / 10^{-12} \text{ J}^{-1} \cdot \text{m}^3$  from thermodynamic definition.

#### 5. Constant volume heat capacity

| P/bar | 268.15 K | 283.15 K | 298.15 K | 313.15 K | 328.15 K |
|-------|----------|----------|----------|----------|----------|
| 1     | 46.62    | 45.56    | 44.51    | 43.03    | 42.16    |
| 250   | 49.21    | 46.66    | 45.44    | 43.80    | 42.74    |
| 500   | 48.53    | 47.29    | 44.97    | 44.48    | 43.63    |
| 750   | 49.87    | 47.83    | 47.31    | 45.49    | 44.47    |
| 1000  | 49.24    | 48.32    | 46.93    | 45.65    | 44.21    |
| 1500  | 51.12    | 49.43    | 47.81    | 46.74    | 45.79    |
| 2000  | 51.32    | 50.51    | 48.65    | 47.36    | 46.75    |
| 2500  | 52.51    | 52.17    | 49.34    | 48.67    | 47.48    |
| 3000  | 53.16    | 51.94    | 50.78    | 49.38    | 48.82    |

Table S6:  $c_V / \text{J} \cdot \text{mol}^{-1} \cdot \text{K}^{-1}$  from fluctation formula in NVE ensemble.

| P/bar | 268.15 K | 283.15 K | 298.15 K | 313.15 K | 328.15 K |
|-------|----------|----------|----------|----------|----------|
| 1     | 47.95    | 47.28    | 45.91    | 43.44    | 38.83    |
| 250   | 48.25    | 47.25    | 45.88    | 43.88    | 40.78    |
| 500   | 48.80    | 47.45    | 46.12    | 44.41    | 41.54    |
| 750   | 49.06    | 47.83    | 46.51    | 44.97    | 42.86    |
| 1000  | 48.92    | 48.29    | 46.97    | 45.55    | 44.00    |
| 1500  | 50.95    | 49.32    | 47.95    | 46.61    | 44.91    |
| 2000  | 51.04    | 50.27    | 48.90    | 47.58    | 46.50    |
| 2500  | 53.05    | 51.13    | 49.75    | 48.44    | 47.08    |
| 3000  | 52.76    | 51.84    | 50.49    | 49.20    | 47.94    |

Table S7:  $c_V/ \text{J.mol}^{-1}.\text{K}^{-1}$  from thermodynamic definition. The table includes the thermodynamic states (involving extrapolated values of volume outside the range explored by MD simulations) which have been rejected in the plot of Figure 4.

## 6. Constant pressure heat capacity

| P/bar | 268.15 K | 283.15 K | 298.15 K | 313.15 K | 328.15 K |
|-------|----------|----------|----------|----------|----------|
| 1     | 84.72    | 83.68    | 82.65    | 81.61    | 80.57    |
| 250   | 83.12    | 82.10    | 81.07    | 80.04    | 79.02    |
| 500   | 83.37    | 81.69    | 80.02    | 78.34    | 76.66    |
| 750   | 82.63    | 81.03    | 79.44    | 77.84    | 76.25    |
| 1000  | 81.05    | 79.99    | 78.92    | 77.85    | 76.78    |
| 1500  | 81.51    | 80.07    | 78.64    | 77.20    | 75.76    |
| 2000  | 80.61    | 79.33    | 78.05    | 76.76    | 75.48    |
| 2500  | 81.90    | 80.03    | 78.15    | 76.27    | 74.40    |
| 3000  | 79.93    | 78.84    | 77.75    | 76.65    | 75.56    |

Table S8:  $c_P/ \text{J.mol}^{-1}.\text{K}^{-1}$  from thermodynamic definition.

## 7. Speed of sound

| P/bar | 268.15 K | 283.15 K | 298.15 K | 313.15 K | 328.15 K |
|-------|----------|----------|----------|----------|----------|
| 1     | 1209.6   | 1189.1   | 1135.1   | 1091.4   | 1057.8   |
| 250   | 1229.0   | 1201.8   | 1151.0   | 1111.0   | 1072.1   |
| 500   | 1251.1   | 1223.3   | 1180.9   | 1149.7   | 1111.9   |
| 750   | 1287.1   | 1256.3   | 1218.6   | 1192.7   | 1153.7   |
| 1000  | 1332.9   | 1297.6   | 1262.6   | 1239.7   | 1198.5   |
| 1500  | 1411.3   | 1377.5   | 1354.3   | 1341.6   | 1308.3   |
| 2000  | 1489.7   | 1458.1   | 1437.8   | 1419.3   | 1397.4   |
| 2500  | 1529.4   | 1507.3   | 1480.9   | 1440.0   | 1436.6   |
| 3000  | 1542.7   | 1525.1   | 1470.5   | 1384.6   | 1388.0   |

Table S9:  $u/ \text{m.s}^{-1}$  from Eq.(9) of the article.

| P/bar | 268.15 K | 283.15 K | 298.15 K | 313.15 K | 328.15 K |
|-------|----------|----------|----------|----------|----------|
| 1     | 1123.4   | 1094.1   | 1039.4   | 993.6    | 956.2    |
| 250   | 1148.3   | 1114.9   | 1063.5   | 1021.5   | 981.3    |
| 500   | 1176.4   | 1142.4   | 1097.1   | 1061.5   | 1021.3   |
| 750   | 1213.5   | 1177.4   | 1136.4   | 1105.5   | 1064.8   |
| 1000  | 1256.8   | 1217.9   | 1180.0   | 1152.6   | 1111.2   |
| 1500  | 1336.4   | 1298.5   | 1269.9   | 1250.2   | 1214.3   |
| 2000  | 1412.6   | 1376.8   | 1350.8   | 1326.8   | 1300.3   |
| 2500  | 1458.0   | 1429.7   | 1398.1   | 1354.8   | 1342.9   |
| 3000  | 1474.4   | 1451.6   | 1397.5   | 1317.3   | 1314.4   |

Table S10:  $u/ \text{m.s}^{-1}$  from Eq.(9) of the article and using the quantum correction for vibrational degrees of freedom (Eq.(6)) for the heat capacity.
